# Supplementary material for: Dietary flaxseed oil rich in omega-3 suppresses severity of type 2 diabetes mellitus via anti-inflammation and modulating gut microbiota in rats
Source: PubMed Central journal article supplement (PMC7006389; doi:10.1186/s12944-019-1167-4), 2020-02-07
Supplement: 12944_2019_1167_MOESM1_ESM.pdf [file 12944_2019_1167_MOESM1_ESM.pdf]

**Additional file 1: Table S1** Fatty acid composition (%) of dietary fats contained.

| <b>Fatty acids</b>             |               | <b>% of total fatty acids</b> |                     |
|--------------------------------|---------------|-------------------------------|---------------------|
| <b>Common name</b>             | <b>Symbol</b> | <b>Corn oil</b>               | <b>Flaxseed oil</b> |
| Lauric acid                    | 12:0          | 0.2                           | 0.2                 |
| Myristic acid                  | 14:0          | 0.9                           | 0.7                 |
| Palmitic acid                  | 16:0          | 16.8                          | 8.6                 |
| Palmitoleic acid               | 16:1 n-7      | 0.4                           | 0.3                 |
| Stearic acid                   | 18:0          | 4.1                           | 5.4                 |
| Oleic acid                     | 18:1 n-9      | 25.7                          | 20.2                |
| Linoleic acid (LA)             | 18:2 n-6      | 51.0                          | 14.3                |
| $\alpha$ -Linolenic acid (ALA) | 18:3 n-3      | 1.0                           | 50.3                |
| SFAs                           |               | 21.8                          | 14.9                |
| MUFAs                          |               | 26.1                          | 20.4                |
| Total PUFAs                    |               | 52.0                          | 64.7                |
| n-6 PUFAs/n-3 PUFAs            |               | 50.0                          | 0.3                 |
