# Supplementary material for: Dietary flaxseed oil rich in omega-3 suppresses severity of type 2 diabetes mellitus via anti-inflammation and modulating gut microbiota in rats
Source: PubMed Central journal article supplement (PMC7006389; doi:10.1186/s12944-019-1167-4), 2020-02-07

**Additional file 2: Fig. S1** Size distribution was estimated by electrophoresis. (number 6-10 is the size distribution in NC/CO group, number 11-15 is the size distribution in NC/FO group, number 21-25 is the size distribution in DM/CO group and number 26-30 is the size distribution in DM/FO group ).

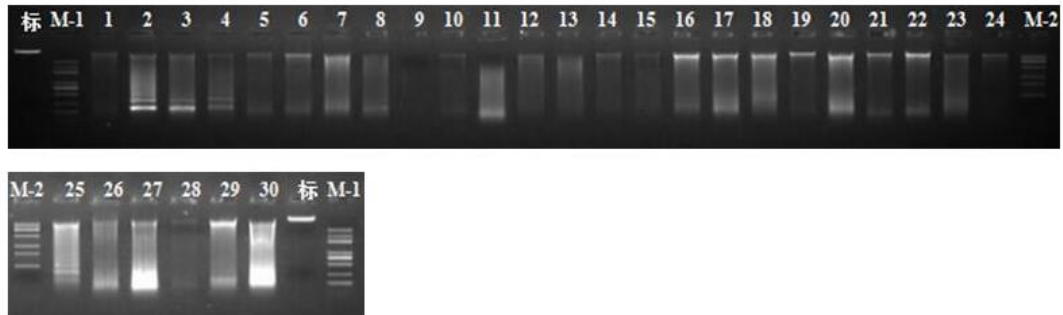

Supplement: 12944_2019_1167_MOESM2_ESM.pdf [file 12944_2019_1167_MOESM2_ESM.pdf]
