# Supplementary material for: Dietary flaxseed oil rich in omega-3 suppresses severity of type 2 diabetes mellitus via anti-inflammation and modulating gut microbiota in rats
Source: PubMed Central journal article supplement (PMC7006389; doi:10.1186/s12944-019-1167-4), 2020-02-07

**Additional file 3: Fig. S2** Correlation analysis of LPS and inflammatory cytokines. (A) IL-1 $\beta$  and LPS; (B) TNF- $\alpha$  and LPS; (C) IL-6 and LPS; (D) IL-17A and LPS.

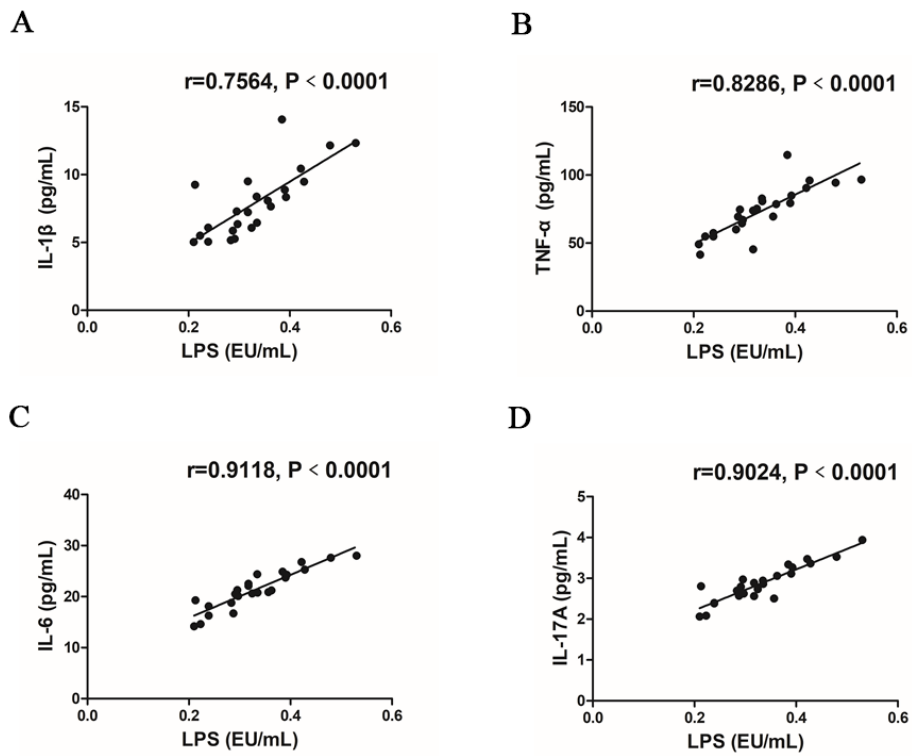

Supplement: 12944_2019_1167_MOESM3_ESM.pdf [file 12944_2019_1167_MOESM3_ESM.pdf]
