# Supplementary material for: Dietary flaxseed oil rich in omega-3 suppresses severity of type 2 diabetes mellitus via anti-inflammation and modulating gut microbiota in rats
Source: PubMed Central journal article supplement (PMC7006389; doi:10.1186/s12944-019-1167-4), 2020-02-07

**Additional file 4: Fig. S3** NMDS analysis showing difference in terms of species in fecal samples.

(A) PF/CO vs. DM/CO; (B) PF/FO vs. DM/FO; (C) DM/CO vs. DM/FO; (D) PF/CO vs. PF/FO.

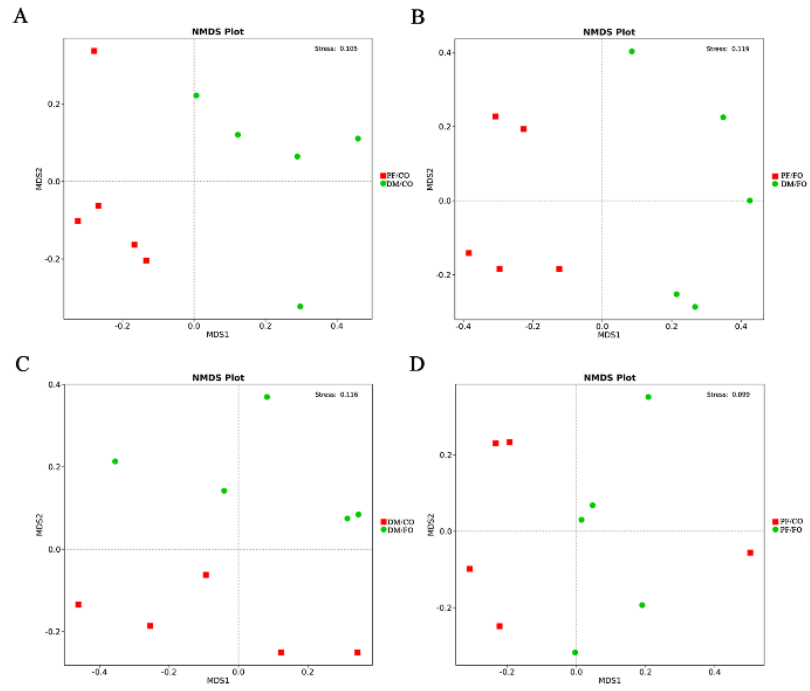

Supplement: 12944_2019_1167_MOESM4_ESM.pdf [file 12944_2019_1167_MOESM4_ESM.pdf]
