# Supplementary material for: Dietary flaxseed oil rich in omega-3 suppresses severity of type 2 diabetes mellitus via anti-inflammation and modulating gut microbiota in rats
Source: PubMed Central journal article supplement (PMC7006389; doi:10.1186/s12944-019-1167-4), 2020-02-07

**Additional file 5: Fig. S4** Effects of different dietary oil on liver injury and in T2DM.

Representative images of hepatic hematoxylin and eosin (H&E) staining. CV, central vein; NH, normal hepatocyte; DH, degeneration of hepatocytes.

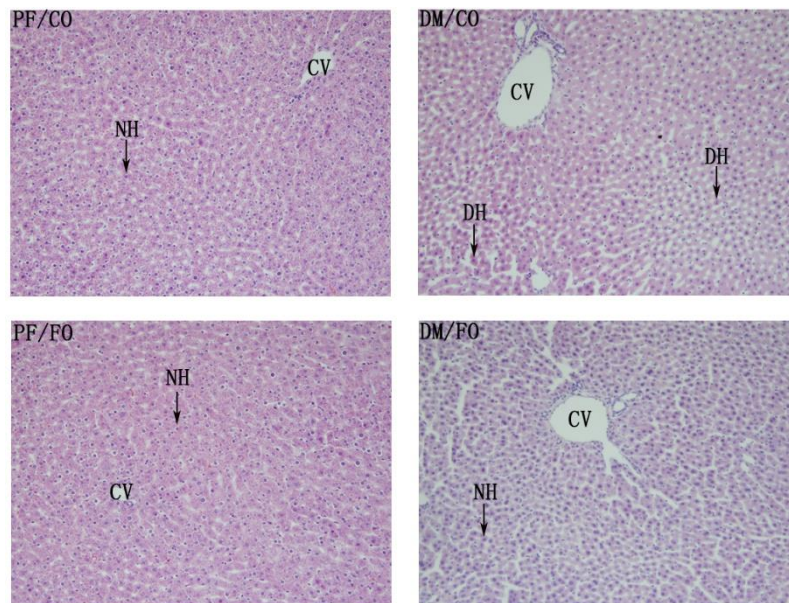

Supplement: 12944_2019_1167_MOESM5_ESM.pdf [file 12944_2019_1167_MOESM5_ESM.pdf]
